# Supplementary material for: Molecularly imprinted polymer-based sensors for atrazine detection by electropolymerization of o-phenylenediamine
Source: Royal Society of Chemistry journal article supplement (doi:10.1039/c5ra09556e), 2015-01-01
Supplement: c5ra09556e1.pdf [file c5ra09556e1.pdf]

## Supplement Information

Table S1 The relative change of peak current of MIP-modified electrode for ATZ and interferents

| concentration/<br>10 <sup>-8</sup> M | $\Delta I/I_0$ |          |          |
|--------------------------------------|----------------|----------|----------|
|                                      | Atrazine       | Simazine | Alachlor |
| 2                                    | 0.10084        | 0.06081  | 0.08447  |
| 4                                    | 0.17746        | 0.11082  | 0        |
| 6                                    | 0.25408        | 0.12265  | 0        |
| 8                                    | 0.33070        | 0.13256  | 0        |
| 10                                   | 0.40732        | 0.13582  | 0        |
